# Supplementary material for: Tumor Treating Fields Concomitant with Sorafenib in Advanced Hepatocellular Cancer: Results of the HEPANOVA Phase II Study
Source: MDPI journal article supplement (doi:10.3390/cancers14061568), 2022-03-18

# **Supplemental Material**

## **Eligibility Criteria**

### **Inclusion Criteria:**

- Hepatocellular cancer (HCC) diagnosed by biopsy, or by imaging criteria (computed tomography/magnetic resonance imaging) and alpha-fetoprotein.
- $\geq 18$  years of age.
- Barcelona Clinic Liver Cancer Staging Stage 0–C.
- Child-Turcotte-Pugh score between 5 and 8 points.
- Measurable disease per Response Evaluation Criteria in Solid Tumors criteria for HCC.
- $\geq 4$  weeks since major surgery.
- Eastern Cooperative Oncology Group performance status of 0–2.
- Life expectancy of  $\geq 12$  weeks.
- All patients must sign written informed consent.
- Able to operate the NovoTTF-100L(P) System independently or with the help of a caregiver.

### **Exclusion Criteria:**

- Patient candidate for surgical resection or local treatment (e.g., transcatheter arterial chemoembolization, selective internal radiation therapy, radiofrequency-

induced thermo-ablation, microwave, surgery).

- High levels of serum hepatitis B viral DNA without anti-viral therapy.
- Prior malignancy requiring anti-tumor treatment (apart from *in-situ* cervical cancer, in situ breast cancer, non-melanomatous skin cancers, or any malignancy for which treatment was received and there is no evidence of disease for  $\geq 5$  years) or concurrent malignancy.
- Significant comorbidities within 4 weeks prior to enrollment, including the following:
  - Neurologic or psychiatric disorders such as dementia and uncontrolled seizures.
  - Active, uncontrolled infections.
  - Active, disseminated coagulation disorder.
  - Significant renal impairment.
  - Clinically significant cardiovascular disease (including myocardial infarction, unstable angina, symptomatic congestive heart failure, serious uncontrolled cardiac arrhythmia).
  - Chronic diarrhea.
  - History of any psychological or psychiatric condition that might impair the patient's ability to understand or comply with the requirements of the study or to provide consent.

- Clinically significant (as determined by the investigator) hematologic or renal dysfunction, defined as: hemoglobin < 10 g/dL, neutrophil count <  $1.5 \times 10^9/L$ , platelet count <  $100 \times 10^9/L$ , or serum creatinine > 1.5 x upper limit of normal.
- Other comorbidities deemed by the investigator as such that may impact the compliance of the patient with the study protocol and follow-up.
- Implanted pacemaker, defibrillator, or other electrical medical devices in the torso.
- Known allergies to medical adhesives or hydrogel.
- Pregnant or breast feeding (all patients of childbearing potential must use highly effective contraception method during the entire period of the study based on the recommendation of the investigator or a gynecologist).
- Admitted to an institution by administrative or court order.

**The name of all Ethics Committees who reviewed and approved the protocol  
and the relevant approval number and date**

| Country | Hospital & Central Ethics Committee                                                                                                                                                                                                                                                                                                                                                                                    |
|---------|------------------------------------------------------------------------------------------------------------------------------------------------------------------------------------------------------------------------------------------------------------------------------------------------------------------------------------------------------------------------------------------------------------------------|
| France  | <p>CHU Nantes, Hôtel-Dieu</p> <p>Service hépato-gastro-entérologie</p> <p>1, place Alexis Ricordeau</p> <p>44093 NANTES Cedex 01</p> <p>Comité de Protection des Personnes OUEST IV – NANTES</p> <p>Immeuble Cap Ouest</p> <p>Maison de la Recherche en Santé</p> <p>53, Chaussée de la Madeleine 44000 NANTES</p> <p>Central Ethics Committee approval: 28.06.2018</p> <p>Ministry of Health approval: 07.06.2018</p> |
| Germany | <p>Medical Center – University of Freiburg, Center for Diagnostic and Therapeutic Radiology</p> <p>Department of Radiation Oncology, Robert-Koch-Straße 3 79106 Freiburg</p> <p>Ethik-Kommission der Albert-Ludwigs-Universität Freiburg</p> <p>Engelberger Straße 21</p> <p>79106 Freiburg</p> <p>Ethics Committee approval: 23.05.2019</p> <p>Ministry of Health approval: 30.11.2018</p>                            |
| Germany | <p>Ulm University Hospital</p> <p>Albert-Einstein-Allee 23</p> <p>D-89081 Ulm/Germany</p> <p>Coordinating Ethics Committee:</p> <p>Ethik-Kommission der Albert-Ludwigs-Universität Freiburg</p> <p>Engelberger Straße 21</p> <p>79106 Freiburg</p>                                                                                                                                                                     |

| Country | Hospital & Central Ethics Committee                                                                                                                                                                                                                                                                                                                                                                                          |
|---------|------------------------------------------------------------------------------------------------------------------------------------------------------------------------------------------------------------------------------------------------------------------------------------------------------------------------------------------------------------------------------------------------------------------------------|
|         | <p>Ethics Committee approval: 22.10.2019</p> <p>Ministry of Health approval: 23.08.2019</p>                                                                                                                                                                                                                                                                                                                                  |
| Spain   | <p>Vall d'Hebrón University Hospital</p> <p>pg Vall d'Hebrón 119-129,</p> <p>08035 Barcelona</p> <p>CEIC Hospital Universitari Vall d'Hebron</p> <p>pg Vall d'Hebrón 119-129,</p> <p>08035 Barcelona</p> <p>Central Ethics Committee approval: 06.04.2018</p> <p>Ministry of Health approval: 14.05.2018</p>                                                                                                                 |
| Spain   | <p>HM Universitario Sanchinarro,</p> <p>CIOCC, C/Oña no. 10, Madrid 28050, Spain</p> <p>CEIC Hospital Universitari Vall d'Hebron</p> <p>pg Vall d'Hebrón 119-129,</p> <p>08035 Barcelona</p> <p>Central Ethics Committee approval: 04.05.2018</p> <p>Ministry of Health approval: 14.05.2018</p>                                                                                                                             |
| Poland  | <p>Clinical Research Center Piotr Npora Doctors Partner Company, ul. Długosza 4 51-162 Wrocław, Poland</p> <p>Coordinating EC:</p> <p>Komisja Bioetyczna przy Uniwersytecie Medycznym</p> <p>im. Karola Marcinkowskiego w Poznaniu</p> <p>Centrum Stomatologii</p> <p>ul. Bukowska 70, pok A204</p> <p>60-812 Poznań</p> <p>Central Ethics Committee approval: 12.09.2019</p> <p>Ministry of Health approval: 14.01.2020</p> |

**Table S1.** Investigational study sites.

| Country | Study site                                                       |
|---------|------------------------------------------------------------------|
| France  | CHU Hôtel-Dieu, Nantes                                           |
| Germany | Medical Center – University of Freiburg,<br>Freiburg             |
| Germany | Ulm University Hospital, Ulm                                     |
| Poland  | Clinical Research Center Piotr Napura Doctors<br>Partner Company |
| Spain   | Vall d'Hebron Institute of Oncology (VHIO),<br>Barcelona         |
| Spain   | HM Sanchinarro University Hospital, Madrid                       |

**Table S2.** Results from the literature search used to calculate the historical control ORR for sorafenib.

| Reference          | <i>N</i> | Regimen                      | ORR (sorafenib) |
|--------------------|----------|------------------------------|-----------------|
| Llovet JM et al    | 299      | Sorafenib 400 mg twice daily | 2.0%            |
| Abou-Alfa GK et al | 137      | Sorafenib 400 mg twice daily | 2.2%            |
| Zhu AX et al       | 358      | Sorafenib 400 mg twice daily | 3.9%            |
| Cainap C et al     | 521      | Sorafenib 400 mg twice daily | 6.9%            |

ORR = overall response rate.

**Table S3.** Response in all evaluable patients treated with TTFields (150 kHz) concomitant with sorafenib, according to CTP class.

| <b>Outcome</b>                     | <b>CTP class A<br/>(<i>n</i> = 11)</b> | <b>CTP class B<br/>(<i>n</i> = 10)</b> | <b>Historical<br/>control*</b> |
|------------------------------------|----------------------------------------|----------------------------------------|--------------------------------|
| Overall response rate, %           | 9.1                                    | 10                                     | 4.5                            |
| Level of response rate, %          |                                        |                                        |                                |
| Complete                           | 0                                      | 0                                      | –                              |
| Partial                            | 9.1                                    | 10                                     | –                              |
| Stable disease                     | 63.6                                   | 70                                     | –                              |
| Disease control rate, %            | 73                                     | 80                                     | –                              |
| In-field control rate at 1 year, % | 9.1                                    | 10                                     | –                              |

\* See Table S2. CTP = Child-Turcotte-Pugh; TTFields = Tumor Treating Fields.



**Table S4.** Time to event outcomes with TTFields (150 kHz) concomitant with sorafenib, according to CTP class.

| <b>Outcome</b>                                              | <b>CTP class A<br/>(<i>n</i> = 11)</b> | <b>CTP class B<br/>(<i>n</i> = 10)</b> |
|-------------------------------------------------------------|----------------------------------------|----------------------------------------|
| OS rate at 1 year, % (95% CI)                               | 29 (17–68)                             | 27 (7–51)                              |
| PFS rate at 12 months, % (95% CI)                           | 29 (5–61)                              | 20 (3–47)                              |
| Distant metastases-free survival rate at 1 year, % (95% CI) | 38 (5–72)                              | 20 (3–47)                              |
| Median time to progression, months (95% CI)                 | 8.9 (3.0–not reached)                  | 6 (0.9–not reached)                    |

CI = confidence interval; CTP = Child-Turcotte-Pugh; OS = overall survival; PFS = progression-free survival;

TTFields = Tumor Treating Fields.

**Figure S1.** Skin Grade 2 skin adverse events experienced by male patient.

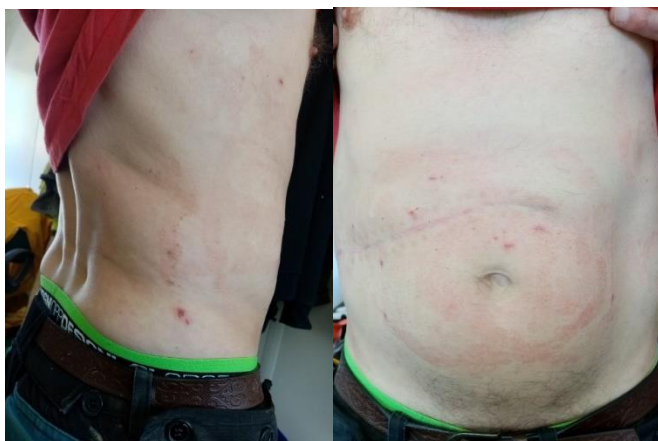

Supplement: s1 [file s1]
